# Supplementary material
Source: PubMed Central journal article supplement (PMC6549300)
Supplement: jama-321-2101-s002.pdf [file jama-321-2101-s002.pdf]

## Supplementary Online Content

Shah SJ, Voors AA, McMurray JJV, et al. Effect of neladenoson bialanate on exercise capacity among patients with heart failure with preserved ejection fraction: a randomized clinical trial. *JAMA*. doi:10.1001/jama.2019.6717

### eMethods

- eTable 1.** Participating Sites and Principal Investigators
- eTable 2.** Inclusion and Exclusion Criteria for PANACHE
- eTable 3.** Secondary Analysis: Pairwise Comparison of Change in 6-Minute Walk Distance From Baseline to 20 Weeks Between Neladenoson Doses vs. Placebo
- eTable 4.** Changes in Primary Endpoint (6-Minute Walk Distance) from Baseline to 20 Weeks: Neladenoson vs. Placebo Groups (Full Analysis Set with Multiple Imputation)
- eTable 5.** Dose-Response Results for Primary and Secondary Endpoints: Per-protocol Set
- eTable 6.** Change in Echocardiographic Outcomes from Baseline to 20 Weeks: Neladenoson vs. Placebo Groups (Full Analysis Set)
- eFigure 1.** Study Design Overview of the PANACHE Trial
- eFigure 2.** Dose-Response Curves Showing Various Model Types Tested Using the MCP-Mod Approach
- eFigure 3.** Changes in Primary and Secondary Efficacy Endpoints From Baseline to 20 Weeks, Neladenoson vs. Placebo Treatment Groups: Parallel Line Plots (Full Analysis Set)
- eFigure 4.** Subgroup Analyses for the Primary End Point (6-Minute Walk Test Distance): Full Analysis Set
- eFigure 5.** Changes in Primary and Secondary Efficacy Endpoints From Baseline to 20 Weeks, Neladenoson vs. Placebo Treatment Groups: Box Plots (Per-Protocol Set)
- eFigure 6.** Changes in Primary and Secondary Efficacy Endpoints From Baseline to 20 Weeks, Neladenoson vs. Placebo Treatment Groups: Parallel Line Plots (Per-Protocol Set)
- eFigure 7.** Relationship between Neladenoson Bialanate Dose Groups and Estimated Glomerular Filtration Rate
- eFigure 8.** Relationship between Neladenoson Bialanate Dose Groups and Potassium
- eFigure 9.** Relationship between Neladenoson Bialanate Dose Groups and Heart Rate
- eFigure 10.** Plasma Concentration of Neladenoson Bialanate by Treatment Group

This supplementary material has been provided by the authors to give readers additional information about their work.

## eMethods

### *Masking of dosing, and matching of placebo*

Dosing was masked by instructing participants to take 2 study tablets once daily. All patients received the same number of tablets (only active, combination of active and placebo, or only placebo, depending on the treatment arm), to maintain blinding, as follows: placebo (2 placebo tablets); neladenoson 5 mg (5-mg tablet plus placebo tablet); neladenoson 10 mg (10-mg tablet plus placebo tablet); neladenoson 20 mg tablet (20-mg tablet plus placebo tablet); neladenoson 30 mg tablet (20-mg tablet plus 10-mg tablet); and neladenoson 40 mg tablet (2 20-mg tablets). Placebo was matched to treatment drug in appearance by adjusting the size and color of the film coat of the placebo tablet to the active tablet; both were pink coated tablets with a diameter of 8 mm and a weight of 185 mg.

### *MCP-Mod statistical approach*

The MCP-Mod statistical approach consists of two key steps. Step 1 is the inferential part of the approach: a one-sided multiple contrast test for an efficacy signal (a non-flat dose-response curve) while controlling for type 1 error ( $\alpha=5\%$ ). Five candidate shapes (linear model,  $E_{\max}$  model, sigmoidal  $E_{\max}$  models 1 and 2, and a quadratic model [**eFigure 2**]) were predefined to cover both plausible and diverse dose-response profiles, reflecting the range of candidate models believed to be capable of describing the dose-response relation at the study design stage. Step 2 is the estimation part of the approach: if a dose-response signal is established in step 1, a dose-response model and target dose(s) of interest were estimated. As pre-specified in the study protocol, a dose-response signal was defined to be present in the primary efficacy analysis if the null hypotheses related to the primary efficacy variable could be rejected. Prior to entry into the

aforementioned dose-response models, NT-proBNP and high-sensitivity troponin T were log-transformed due to a right-skewed distribution in both end points.

### ***Treatment adherence and pharmacokinetics***

To monitor treatment adherence, the investigators were required to document drug dispensing for each participant. Accountability was determined for all tablets at the scheduled visits, when participants were to return all remaining unused study drug, as well as all empty packaging. Any discrepancies between actual and expected amount of returned study medication was discussed and reconciled with the participant at the time of the visit. Treatment adherence was defined as  $100 \times \text{number of tablets taken} / \text{number of tablets planned}$ . Plasma concentration of the study drug was measured in all study participants during the following study visits and times: baseline, 2 hours post-dose; Week 4 [Day 28], pre-dose; Week 8 [Day 56], pre-dose; Week 12 [Day 84], 2 and 4 hours post-dose; Week 20 [end-of-treatment]; and Week 24 [safety follow-up], 28-days after end-of-treatment.

**eTable 1. Participating Sites and Principal Investigators**

| Country  | Site investigator (first name) | Site investigator (last name) | Center                                                     |
|----------|--------------------------------|-------------------------------|------------------------------------------------------------|
| Austria  | Christopher                    | Adlbrecht                     | Krankenhaus Hietzing                                       |
| Austria  | Johann                         | Auer                          | Krankenhaus St. Josef Braunau                              |
| Austria  | Diana                          | Bonderman                     | Allgemeines Krankenhaus der Stadt Wien                     |
| Austria  | Regina                         | Mascherbauer-Steringer        | Krankenhaus der Elisabethinen Linz GmbH                    |
| Austria  | Deddo                          | Moertl                        | Universitätsklinikum St. Pölten                            |
| Austria  | Dirk                           | von Lewinski                  | Medizinische Universität Graz                              |
| Belgium  | Michel                         | DE CEUNINCK                   | AZ Delta                                                   |
| Belgium  | Etiënne                        | HOFFER                        | CHR de la Citadelle                                        |
| Belgium  | Philippe                       | Timmermans                    | Jessa Ziekenhuis                                           |
| Bulgaria | Valentina                      | Grigorova                     | Medical Center Cardiohelp                                  |
| Bulgaria | Ivan                           | Kamburov                      | MCOMH Preventsia-2000                                      |
| Bulgaria | Kostadin                       | Kichukov                      | Spec Hosp for Active Treatm in Cardiology Sv Georgi Pernik |
| Bulgaria | Elena                          | Kinova                        | UMHAT Tsaritsa Joanna-ISUL EAD Sofia                       |
| Bulgaria | Sotir                          | Marchev                       | Specialized Hospital for Actrive Treatm of Card - Pleven   |
| Bulgaria | Valentina                      | Mincheva                      | NMTH Tzar Boris III                                        |
| Germany  | Hans-Dirk                      | Düngen                        | Charité Campus Virchow-Klinikum (CVK)                      |
| Germany  | Sabine                         | Genth-Zotz                    | St. Vincenz und Elisabeth Hospital, Kathol. Klinikum Mainz |
| Germany  | Peter                          | Heymer                        | Klinische Forschung Dresden GmbH                           |
| Germany  | Niels                          | Menck                         | HELIOS Klinikum Erfurt GmbH                                |
| Greece   | Nikolaos                       | Kafkas                        | KAT General Hospital of Athens                             |
| Greece   | Apostolos                      | Karavidas                     | G. Gennimatas General State Hospital of Athens             |
| Greece   | Athanasios                     | Manolis                       | Asklipieion General Hospital of Voulas                     |
| Greece   | Ioannis                        | Mantas                        | General Hospital of Chalkida                               |
| Greece   | Sotirios                       | Patsilinakos                  | Konstantopoulou General Hospital of Nea Ionia - Agia Olga  |
| Greece   | Vassilios                      | Vassilikos                    | Hippokration General Hospital of Thessaloniki              |
| Israel   | Yaron                          | Arbel                         | Tel-Aviv Sourasky Medical Center                           |
| Israel   | Tal                            | Hasin                         | Shaare Zedek Medical Center                                |
| Israel   | Amos                           | Katz                          | Barzilai Medical Center                                    |
| Israel   | David                          | Leibowitz                     | Hadassah University Hospital Mount Scopus                  |
| Israel   | Gil                            | Moravsky                      | Assaf Harofeh Medical Center                               |
| Israel   | Eugenia                        | Nikolsky                      | Rambam Health Corporation                                  |
| Israel   | Avraham                        | Shotan                        | Hillel Yaffe Medical Center                                |
| Italy    | Giuseppe                       | Argiolas                      | A.O.U. di Sassari                                          |
| Italy    | Franco                         | Cosmi                         | AUSL 8 Arezzo                                              |
| Italy    | Lucio                          | Mos                           | AAS 3 Friuli Alto Medio Collin                             |
| Italy    | Savina                         | Nodari                        | ASST Spedali Civili di Brescia                             |
| Italy    | Claudio                        | Norbiato                      | A.O. Ordine Mauriziano                                     |
| Italy    | Michele                        | Senni                         | ASST Papa Giovanni XXIII                                   |
| Italy    | Massimo                        | Volpe                         | A.O. Sant Andrea                                           |
| Japan    | Takahiko                       | Aoyama                        | Fukui Prefectural Hospital                                 |
| Japan    | Hiroyuki                       | Fujinaga                      | Tokushima Prefectural Central Hospital                     |

| Country       | Site investigator (first name) | Site investigator (last name) | Center                                                      |
|---------------|--------------------------------|-------------------------------|-------------------------------------------------------------|
| Japan         | Shinichi                       | Higashiue                     | Kishiwada Tokushukai Hospital                               |
| Japan         | Masaaki                        | Hoshiga                       | Osaka Medical College Hospital                              |
| Japan         | Masaaki                        | Hoshiga                       | Osaka Medical College Hospital                              |
| Japan         | Masahiko                       | Koda                          | Chuno kosei Hospital                                        |
| Japan         | Mamoru                         | Manita                        | R.I.A.C Naha City Hospital                                  |
| Japan         | Seiji                          | Namba                         | Okayama Rosai Hospital                                      |
| Japan         | Haruhiko                       | Onaka                         | Takatsuki Red Cross Hospital                                |
| Japan         | Satoru                         | Sakagami                      | National Hospital Organization Kanazawa Medical Center      |
| Japan         | Tsuyoshi                       | Shiga                         | Tokyo Women s Medical University Hospital                   |
| Japan         | Shinji                         | Tanaka                        | Shonan Fujisawa Tokushukai Hospital                         |
| Japan         | Ryoji                          | Taniguchi                     | Hyogo Prefectural Amagasaki General Medical Center          |
| Japan         | Takahisa                       | Yamada                        | Osaka General Medical Center                                |
| Poland        | Janusz                         | Bednarski                     | Szpital Zachodni w Grodzisku Mazowieckim                    |
| Poland        | Jaroslav                       | Kasprzak                      | Wojewodzki Specjalistyczny Szpital im. dr Wl. Bieganskiego  |
| Poland        | Waldemar                       | Krysiak                       | 109 Szpital Wojskowy z przychodnia SPZOZ                    |
| Poland        | Ewa                            | Mirek-Bryniarska              | Szpital Specjalistyczny im. J. Dietla                       |
| Poland        | Wlodzimierz                    | Musial                        | Uniwersytecki Szpital Kliniczny w Bialymstoku               |
| Poland        | Joanna                         | Szachniewicz                  | IV Wojskowy Szpital Kliniczny z Poliklinika, SPZOZ          |
| Poland        | Dariusz                        | Wojciechowski                 | Szpital Wolski im. dr Anny Gostynskiej SPZOZ                |
| Portugal      | Candida                        | Fonseca                       | Hospital São Francisco Xavier                               |
| Portugal      | Irene                          | Marques                       | Centro Hospitalar do Porto, EPE - Hospital de Santo Antonio |
| Portugal      | Pedro                          | Monteiro                      | CHUC - Hospitais da Universidade de Coimbra                 |
| Portugal      | Pedro                          | Moraes Sarmento               | Hospital da Luz                                             |
| Spain         | Luís                           | Almenar Bonet                 | Hospital Universitari i Politècnic La Fe                    |
| Spain         | Ramón                          | Bover Freire                  | Hospital Clínico Universitario San Carlos                   |
| Spain         | Alberto                        | Esteban Fernández             | Hospital Sanitas La Zarzuela                                |
| Spain         | Núria                          | Farré López                   | Hospital del Mar                                            |
| Spain         | Francisco                      | Fernández Avilés              | Hospital General Universitario Gregorio Marañón             |
| Spain         | José Manuel                    | García Pinilla                | Hospital Virgen de la Victoria                              |
| Spain         | Julio Eduardo                  | Núñez Villota                 | Hospital Clínico Universitario de Valencia                  |
| Spain         | Domingo A.                     | Pascual Figal                 | Hospital Universitario Virgen de la Arrixaca                |
| United States | Sadiya                         | Khan                          | Northwestern University                                     |
| United States | Dalane                         | Kitzman                       | Wake Forest Baptist Health                                  |
| United States | Keith                          | Miller                        | Bryan LGH Medical Center East                               |
| United States | Harvey                         | Serota                        | St. Louis Heart & Vascular, PC                              |

**eTable 2. Inclusion and Exclusion Criteria for PANACHE**

---

**Inclusion criteria:**

1. Men or women aged 45 years and older
2. Diagnosis of chronic HF, NYHA class II–IV (without evidence of a non-cardiac explanation for dyspnea), LVEF  $\geq$  45% assessed by any imaging modality (e.g. echocardiography, cardiac magnetic resonance, or cine levocardiography) within the previous 6 months with no significant change in clinical status suggesting potential for deterioration in ejection fraction
3. In the 6 months prior to run-in:
  - a) requirement for treatment with a diuretic AND
  - b) elevated natriuretic peptides, defined as one of:
    - BNP  $\geq$  75 pg/mL or NT-proBNP  $\geq$  300 pg/mL (sinus rhythm) or
    - BNP  $\geq$  200 pg/mL or NT-proBNP  $\geq$  900 pg/mL (atrial fibrillation) AND
  - c) at least one of the following:
    - LA enlargement (LA diameter  $\geq$  3.9 cm, LA volume  $\geq$  55 mL, LAVI  $\geq$  29 mL/m<sup>2</sup>, or LA area  $\geq$  20 cm<sup>2</sup>) (assessed by local imaging)
    - LV hypertrophy (septal or posterior wall thickness  $\geq$  1.1 cm) (local imaging)
    - elevated filling pressures (invasive assessment) at rest (PAWP  $\geq$  20 mmHg or LVEDP  $\geq$  15 mmHg) or with exercise (PAWP  $\geq$  25 mmHg) (historical records)
4. 6MWD  $\geq$  100 m and  $\leq$  550 m at visit 2 (baseline)
5. Written informed consent signed before any study-specific procedure

---

**Exclusion criteria:**

1. Acute decompensated HF (defined as acute exacerbation of HF that may require IV therapy with diuretics, vasodilators, or inotropic drugs and/or mechanical support) within the past 4 weeks
2. Initiation or dose modification of CV pharmacological therapy within the past 2 weeks (dose modification of pre-existing diuretic/anticoagulant medication is allowed based on patient-specific needs)
3. Inability to exercise: wheelchair/scooter/walker dependent; dependent on supplemental oxygen
4. HF is not the primary factor limiting activity as indicated by the patient affirming #1, #2, or #3 of the following questionnaire:

My ability to be active is most limited by:

  - #1 joint, foot, leg, hip, or back pain
  - #2 unsteadiness or dizziness impairing daily mobility
  - #3 lifestyle, weather, or I just don't like to be active
5. Previous diagnosis of HFrEF (LVEF  $<$  40%)
6. Known clinically significant persistent coronary ischemia (based on medical history or a pre-existing or recent clinical stress test)
7. Occurrence of any of the following within the previous 3 months:
  - clinically evident myocardial infarction
  - hospitalization for unstable angina
  - stroke or transient ischemic attack
  - CABG
  - PCI
  - implantation of a CRTD
  - major surgery (that could interfere with the patient's ability to exercise)
8. PCI, CABG, or implantation of a CRTD planned between randomization and end of study
9. Sustained systolic blood pressure  $\leq$  90 mmHg and/or signs and symptoms of hypotension prior to randomization
10. Sustained systolic blood pressure  $\geq$  160 mmHg prior to randomization
11. Sustained bradycardia with heart rate  $<$  50 beats/minute or tachycardia with heart rate  $>$  100 beats/minute prior to randomization
12. Known clinically relevant ventricular arrhythmias (sustained ventricular tachycardia, ventricular flutter, or fibrillation) within 3 months prior to randomization based on either medical history or device-generated data (if applicable)

---

**Exclusion criteria (continued):**

13. Clinically relevant permanent or intermittent AV block > grade II in patients without a permanent pacemaker or ICD/CRTD
14. Severe uncorrected valvular heart disease
15. Listing for heart transplantation and/or anticipated implantation of a ventricular assist device
16. Severe pulmonary disease with any of the following:
  - requirement for continuous (home) oxygen
  - history of chronic obstructive pulmonary disease  $\geq$  GOLD III
  - use of systemic corticosteroids
17. Asthma bronchiale with either of the following:
  - symptoms not well controlled within the past 6 months or
  - ever intubated or in an intensive care unit for asthma
18. Anemia with hemoglobin < 10 g/dL within 3 months prior to randomization; if several values are available, the latest result should be used
19. Body mass index > 45 kg/m<sup>2</sup> at randomization
20. eGFR < 30 mL/min/1.73 m<sup>2</sup> calculated by Modification of Diet in Renal Disease formula within 3 months prior to randomization; if several values are available, the latest result should be used
21. Hepatic insufficiency classified as Child–Pugh B or C, or any of the following:
  - PBC
  - primary sclerosing cholangitis
  - PBC-autoimmune hepatitis overlap syndrome
22. Concomitant use of any of the following therapies that cannot be discontinued:
  - moderate or strong CYP3A4 inhibitors (of note, grapefruit is a strong CYP3A4 inhibitor)
  - CYP3A4 inducers
  - strong CYP2C8 inhibitors (of note, clopidogrel is a strong CYP2C8 inhibitor)
  - theophylline
  - drugs having significant pre-systemic clearance via UGT1A1 in the intestine  
(Respective substances must be stopped at least 7 days before randomization)
23. Women of childbearing potential (women are considered of childbearing potential if they are not surgically sterile or postmenopausal, defined as amenorrhea for > 12 months)
24. Known current heavy alcohol consumption or the use of illicit drugs that may interfere with the patient's safety and/or compliance
25. Previous (within 30 days or 5 half-lives of the investigational drug, whichever is longer) or concomitant participation in another clinical study with investigational medicinal product(s) or device(s)
26. Previous assignment to treatment during this study
27. Any condition or therapy that would make the patient unsuitable for the study, or life expectancy less than 12 months (e.g. active malignancy)
28. Close affiliation with the investigational site (e.g. close relative of the investigator or dependent person e.g. employee or student of the investigational site)
29. Known allergies, intolerance, or hypersensitivities to the study treatment (active substance or excipients), adhesives, or hydrogel

---

6MWD, 6-minute walk distance; AV, atrioventricular; BNP, brain natriuretic peptide; CABG, coronary artery bypass graft; CRTD, cardiac resynchronization therapy device; CV, cardiovascular; CYP, cytochrome P450; eGFR, estimated glomerular filtration rate; HF, heart failure; HFrEF, heart failure with reduced ejection fraction; ICD, implantable cardioverter defibrillator; IV, intravenous; LA, left atrial; LAVI, left atrial volume index; LV, left ventricular; LVEDP, left ventricular end-diastolic pressure; LVEF, left ventricular ejection fraction; NT-proBNP, N-terminal prohormone of brain natriuretic peptide; NYHA, New York Heart Association; PAWP, pulmonary artery wedge pressure; PBC, primary biliary cirrhosis; PCI, percutaneous coronary intervention.

**eTable 3. Secondary Analysis: Pairwise Comparison of Change in 6-Minute Walk Distance From Baseline to 20 Weeks Between Neladenoson Doses vs. Placebo**

| Treatment comparison with Placebo | Difference of Means (Neladenoson - Placebo) | 90% CI of Difference | Two-sided p-value | Adjusted 90% CI of Difference | Adjusted two-sided p-value |
|-----------------------------------|---------------------------------------------|----------------------|-------------------|-------------------------------|----------------------------|
| Neladenoson 5mg vs. Placebo       | 19.0                                        | [-6.2, 44.1]         | 0.21              | [-15.9, 53.8]                 | 0.65                       |
| Neladenoson 10mg vs. Placebo      | 20.4                                        | [0.5, 40.4]          | 0.09              | [-7.2, 48.1]                  | 0.35                       |
| Neladenoson 20mg vs. Placebo      | 12.5                                        | [-7.8, 32.8]         | 0.31              | [-15.6, 40.7]                 | 0.80                       |
| Neladenoson 30mg vs. placebo      | 13.1                                        | [-8.5, 34.6]         | 0.32              | [-16.8, 42.9]                 | 0.81                       |
| Neladenoson 40mg vs. placebo      | 14.6                                        | [-6.5, 35.7]         | 0.25              | [-14.6, 43.8]                 | 0.72                       |

6MWD = 6-min walking distance

Adjusted p-values and confidence limits were calculated with a Dunnett test. In the adjusted comparisons, baseline values of 6MWD, age, and gender were used as covariates.



**eTable 4. Changes in Primary Endpoint (6-Minute Walk Distance) from Baseline to 20 Weeks: Neladenoson vs. Placebo Groups (Full Analysis Set with Multiple Imputation)**

| <b>Treatment group</b>                                                                                                                       | <b>Mean change in 6MWD (m)</b> | <b>90% CI</b> |
|----------------------------------------------------------------------------------------------------------------------------------------------|--------------------------------|---------------|
| Placebo                                                                                                                                      | 0.4                            | -9.8, 10.6    |
| Neladenoson 5mg                                                                                                                              | 19.4                           | -4.2, 43.0    |
| Neladenoson 10mg                                                                                                                             | 28.3                           | 6.8, 49.7     |
| Neladenoson 20mg                                                                                                                             | 14.0                           | 0.9, 27.1     |
| Neladenoson 30mg                                                                                                                             | 18.4                           | 3.8, 33.1     |
| Neladenoson 40mg                                                                                                                             | 13.1                           | -3.2, 29.4    |
| Multiple imputation is done by treatment group with 100 imputations. Baseline value of 6MWD and gender are included in the imputation model. |                                |               |
|                                                                                                                                              |                                |               |
|                                                                                                                                              |                                |               |

| <b>Candidate model shape</b> | <b>P-value</b> |
|------------------------------|----------------|
| Linear                       | 0.35           |
| SigmoidalEmax1               | 0.19           |
| SigmoidalEmax2               | 0.45           |
| Emax                         | 0.05           |
| Quadratic                    | 0.16           |

MCP-Mod) was applied to calculate the p-values of the contrast tests for each candidate dose-response model.

**eTable 5. Dose-Response Results for Primary and Secondary Endpoints: Per Protocol Set**

| End Points                                                                                       | Neladenoson bialanate |                      |                      |                      |                      | Placebo              | MCP-Mod candidate model shape | P-value |
|--------------------------------------------------------------------------------------------------|-----------------------|----------------------|----------------------|----------------------|----------------------|----------------------|-------------------------------|---------|
|                                                                                                  | 40 mg                 | 30 mg                | 20 mg                | 10 mg                | 5 mg                 |                      |                               |         |
| <b>Primary End Point</b>                                                                         |                       |                      |                      |                      |                      |                      |                               |         |
| 6-minute walk distance (m), mean (95% confidence interval [CI]) change from baseline to 20 weeks | n=37                  | n=34                 | n=41                 | n=44                 | n=22                 | n=65                 | -                             | -       |
|                                                                                                  | 10.7<br>(-9.4, 30.8)  | 16.3<br>(-3.1, 35.6) | 14.5<br>(-2.5, 31.6) | 27.2<br>(-0.2, 54.6) | 24.7<br>(-7.4, 56.9) | 1.9<br>(-10.4, 14.2) | Linear                        | 0.52    |
|                                                                                                  |                       |                      |                      |                      |                      |                      | SigmoidalEmax1                | 0.33    |
|                                                                                                  |                       |                      |                      |                      |                      |                      | SigmoidalEmax2                | 0.62    |
|                                                                                                  |                       |                      |                      |                      |                      |                      | Emax                          | 0.09    |
|                                                                                                  |                       |                      |                      |                      |                      | Quadratic            | 0.27                          |         |
| <b>Secondary End Points</b>                                                                      |                       |                      |                      |                      |                      |                      |                               |         |
| Physical activity intensity (%), mean (95% CI) change from baseline to 20 weeks                  | n=32                  | n=30                 | n=33                 | n=34                 | n=20                 | n=52                 | -                             | -       |
|                                                                                                  | -0.1<br>(-0.3, 0.1)   | -0.2<br>(-0.4, 0.0)  | -0.1<br>(-0.3, 0.2)  | -0.1<br>(-0.3, 0.1)  | -0.2<br>(-0.5, 0.0)  | -0.2<br>(-0.4, 0.0)  | Linear                        | 0.46    |
|                                                                                                  |                       |                      |                      |                      |                      |                      | SigmoidalEmax1                | 0.33    |
|                                                                                                  |                       |                      |                      |                      |                      |                      | SigmoidalEmax2                | 0.47    |
|                                                                                                  |                       |                      |                      |                      |                      |                      | Emax                          | 0.43    |
|                                                                                                  |                       |                      |                      |                      |                      | Quadratic            | 0.38                          |         |
| KCCQ overall summary score, mean (95% CI) change from baseline to 20 weeks*                      | n=37                  | n=33                 | n=41                 | n=44                 | n=22                 | n=65                 | -                             | -       |
|                                                                                                  | 2.8<br>(-1.8, 7.5)    | 0.5<br>(-4.6, 5.5)   | 3.7<br>(-0.4, 7.9)   | -0.7<br>(-6.7, 5.3)  | 7.0<br>(-0.7, 14.7)  | 2.9<br>(-0.4, 6.2)   | Linear                        | 0.77    |
|                                                                                                  |                       |                      |                      |                      |                      |                      | SigmoidalEmax1                | 0.87    |
|                                                                                                  |                       |                      |                      |                      |                      |                      | SigmoidalEmax2                | 0.75    |
|                                                                                                  |                       |                      |                      |                      |                      |                      | Emax                          | 0.78    |
|                                                                                                  |                       |                      |                      |                      |                      | Quadratic            | 0.82                          |         |
| NT-proBNP (pg/ml), mean (SD) mean (95% CI) change from baseline to 20 weeks                      | n=36                  | n=32                 | n=38                 | n=43                 | n=20                 | n=60                 | -                             | -       |
|                                                                                                  | 301<br>(-71, 674)     | 185<br>(-14, 383)    | 163<br>(-115, 441)   | 143<br>(-77, 363)    | 50<br>(-394, 493)    | 26<br>(-124, 175)    | Linear                        | >0.99   |
|                                                                                                  |                       |                      |                      |                      |                      |                      | SigmoidalEmax1                | >0.99   |
|                                                                                                  |                       |                      |                      |                      |                      |                      | SigmoidalEmax2                | >0.99   |
|                                                                                                  |                       |                      |                      |                      |                      |                      | Emax                          | >0.99   |
|                                                                                                  |                       |                      |                      |                      |                      | Quadratic            | >0.99                         |         |
| High-sensitivity troponin T (pg/ml), mean (95% CI) change from baseline to 20 weeks              | n=36                  | n=33                 | n=38                 | n=44                 | n=22                 | n=60                 | -                             | -       |
|                                                                                                  | 4.3<br>(1.0, 7.6)     | 3.0<br>(0.6, 5.3)    | 5.0<br>(2.0, 8.1)    | 3.1<br>(0.4, 5.8)    | 1.6<br>(-3.4, 6.5)   | 2.1<br>(0.1, 4.1)    | Linear                        | 0.96    |
|                                                                                                  |                       |                      |                      |                      |                      |                      | SigmoidalEmax1                | 0.98    |
|                                                                                                  |                       |                      |                      |                      |                      |                      | SigmoidalEmax2                | 0.98    |
|                                                                                                  |                       |                      |                      |                      |                      |                      | Emax                          | 0.93    |
|                                                                                                  |                       |                      |                      |                      |                      | Quadratic            | 0.98                          |         |

KCCQ = Kansas City Cardiomyopathy Questionnaire; NT-proBNP = N-terminal pro-B-type natriuretic peptide

An increase (positive value) denotes improvement for 6-minute walk test distance, physical activity intensity, and KCCQ score, and denotes worsening for NT-proBNP and high-sensitivity troponin T. A decrease (negative value) denotes worsening for 6-minute walk test distance, physical activity intensity, and KCCQ score, and denotes improvement for NT-proBNP and high-sensitivity troponin T. See also text for calculation and meaning of physical activity intensity.

The Multiple Comparison Procedure-Modeling approach (MCP-Mod) was applied to calculate the adjusted p-values of the contrast tests for each candidate dose-response model. The P-values tested the hypothesis that a dose-response signal corresponding to the specified model types have been detected. Model shapes are shown in **eFigure 2, Supplement 2**.

\*The KCCQ overall summary score ranges from 0-100; lower scores indicate lower quality of life. A 5-point increase is considered to be a clinically meaningful improvement.

**eTable 6. Echocardiographic Outcomes: Full Analysis Set**

| End Points                                                                                       | Neladenoson bialanate |             |             |             |             | Placebo     | MCP-Mod candidate model shape | P-value |
|--------------------------------------------------------------------------------------------------|-----------------------|-------------|-------------|-------------|-------------|-------------|-------------------------------|---------|
|                                                                                                  | 40 mg                 | 30 mg       | 20 mg       | 10 mg       | 5 mg        |             |                               |         |
| <b>Primary End Point</b>                                                                         |                       |             |             |             |             |             |                               |         |
| 6-minute walk distance (m), mean (95% confidence interval [CI]) change from baseline to 20 weeks | n=33                  | n=30        | n=30        | n=31        | n=19        | n=56        | -                             | -       |
|                                                                                                  | -1.45 (3.6)           | -2.40 (3.2) | -1.03 (3.9) | -0.60 (3.2) | 0.03 (2.6)  | -0.73 (3.7) | Linear                        | 0.52    |
|                                                                                                  |                       |             |             |             |             |             | SigmoidalEmax1                | 0.33    |
|                                                                                                  |                       |             |             |             |             |             | SigmoidalEmax2                | 0.62    |
|                                                                                                  |                       |             |             |             |             |             | Emax                          | 0.09    |
|                                                                                                  |                       |             |             |             |             | Quadratic   | 0.27                          |         |
| E/e' ratio, mean (SD) change from baseline to 20 weeks (higher change value = worsening)         | n=35                  | n=24        | n=27        | n=25        | n=17        | n=45        | -                             | -       |
|                                                                                                  | 0.96 (5.4)            | 0.05 (3.2)  | 0.27 (5.5)  | 0.45 (5.0)  | 2.21 (7.82) | -0.28 (3.0) | NA                            | NA      |
| LA volume (ml), mean (SD) change from baseline to 20 weeks (higher change value = worsening)     | n=31                  | n=30        | n=30        | n=32        | n=19        | n=54        | -                             | -       |
|                                                                                                  | 6.8 (23.6)            | 6.9 (14.4)  | 3.9 (21)    | 6.6 (21.8)  | 3.7 (20.0)  | 3.0 (15.9)  | NA                            | NA      |

LV = left ventricular; LA = left atrial; NA = not applicable.

\*The Multiple Comparison Procedure-Modeling approach (MCP-Mod) was applied to calculate the adjusted p-values of the contrast tests for each candidate dose-response model. Formal statistical testing was not done for E/e' ratio and LA volume because these were exploratory endpoints and changes were similar across groups.

**eFigure 1. Study Design Overview of the PANACHE Trial**

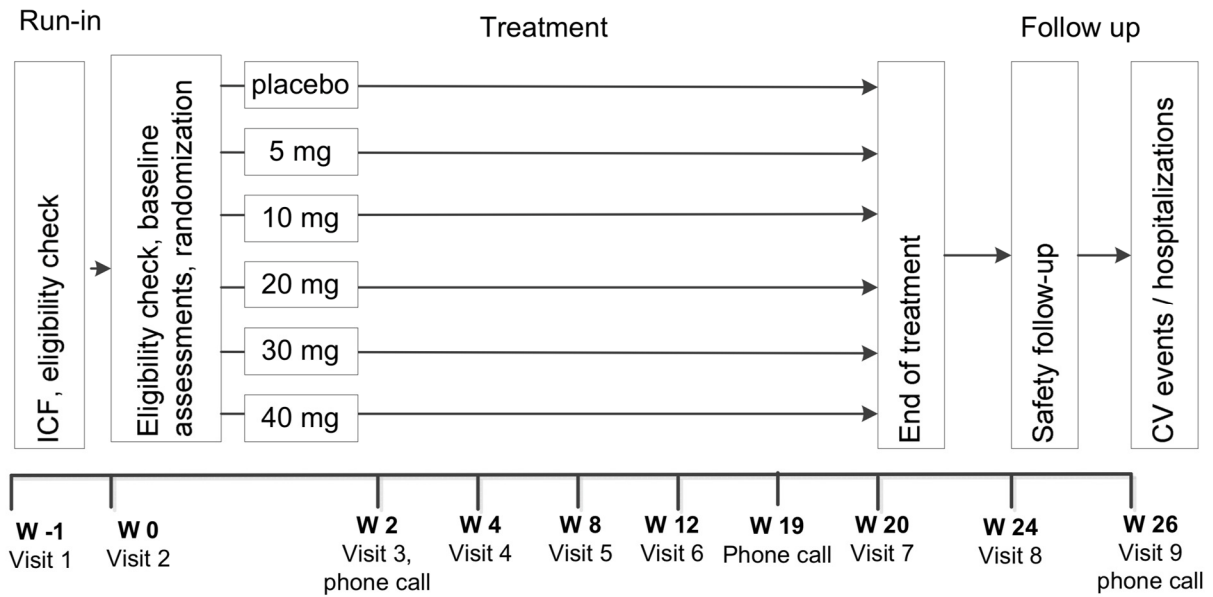

CV = cardiovascular; ICF = informed consent form; W = week

**eFigure 2. Dose-Response Curves Showing Various Model Types Tested Using the MCP-Mod Approach**

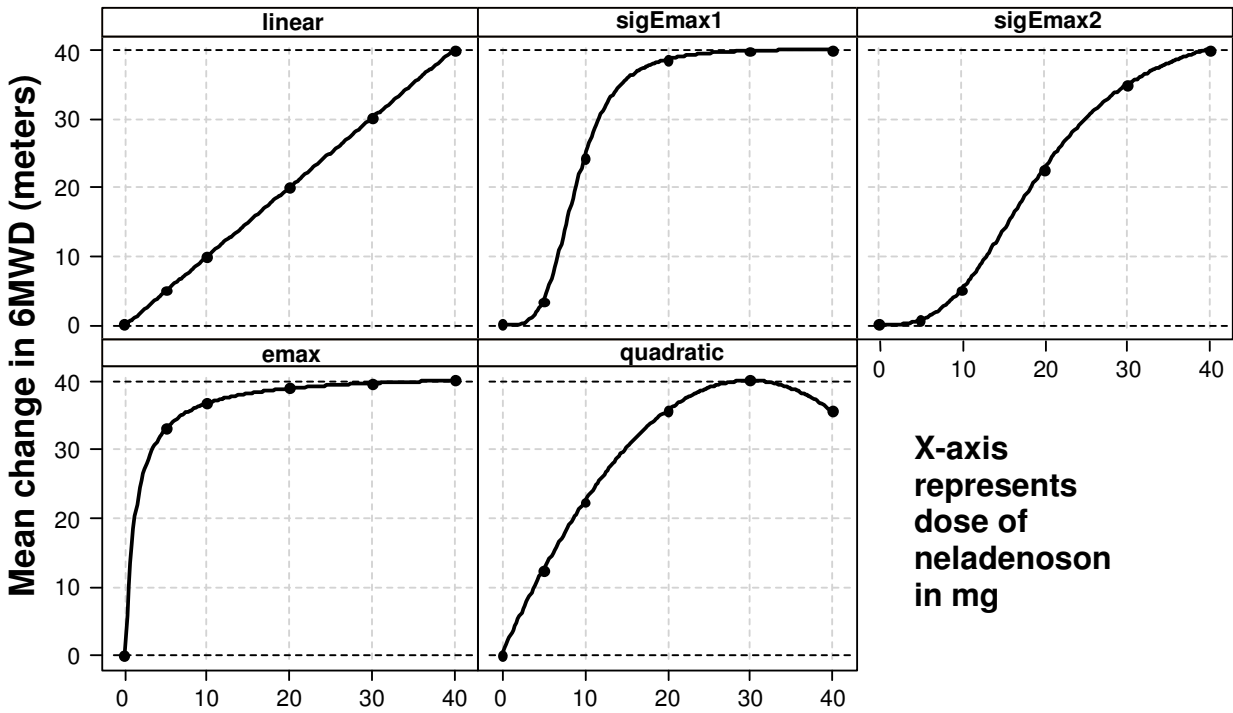

6MWD = 6-minute walk distance

**eFigure 3. Changes in Primary and Secondary Efficacy Endpoints From Baseline to 20 Weeks, Neladenoson vs. Placebo Treatment Groups: Parallel Line Plots (Full Analysis Set)**

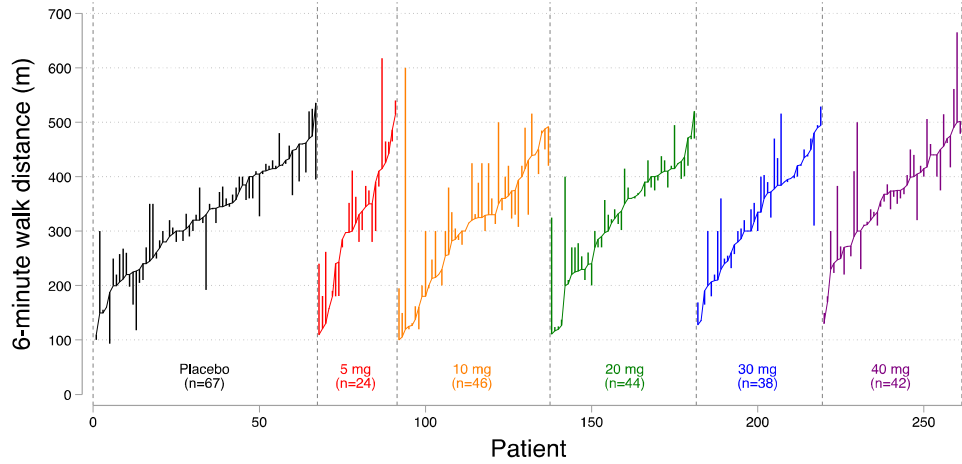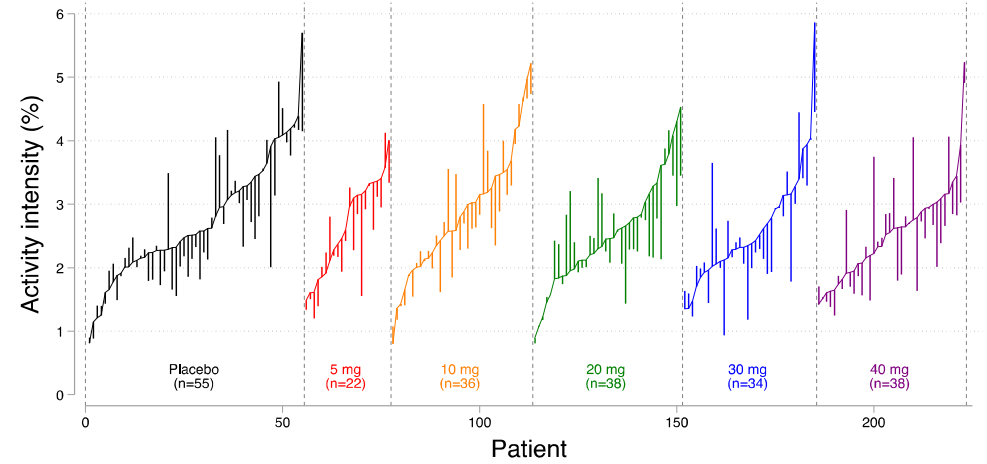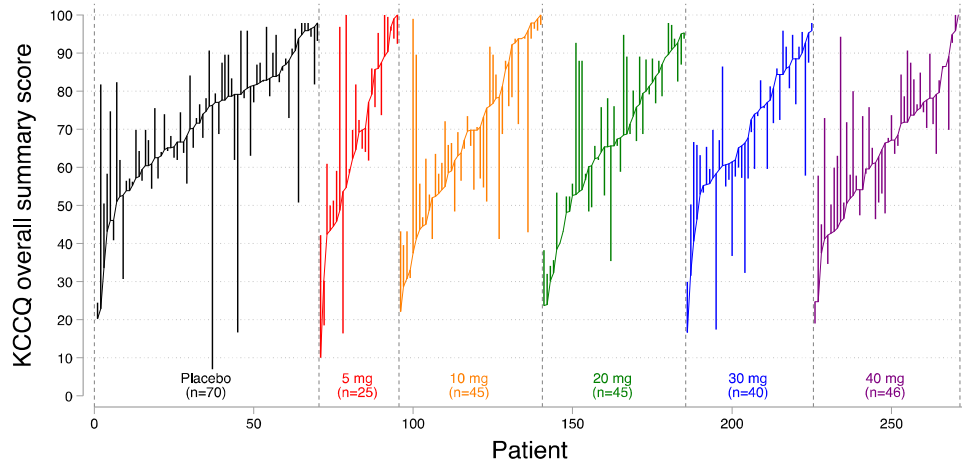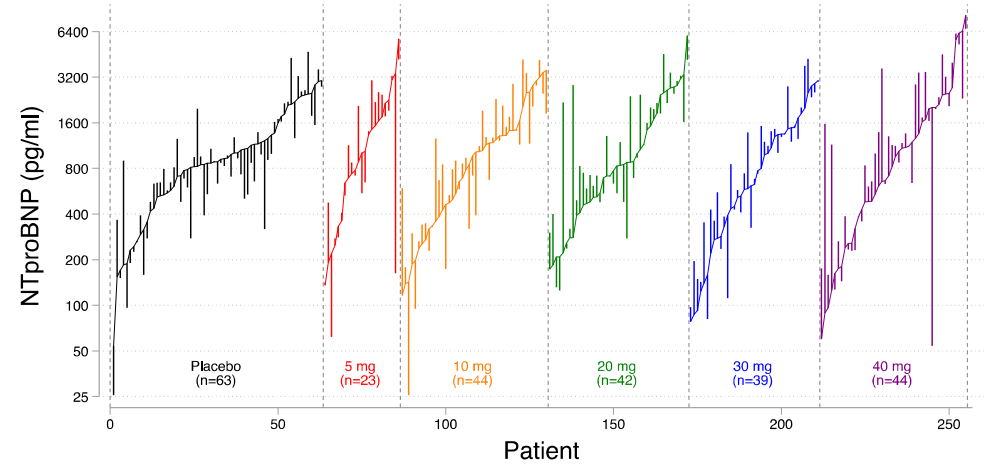

**eFigure 4. Subgroup Analyses for the Primary End Point (6MWD): Full Analysis Set**

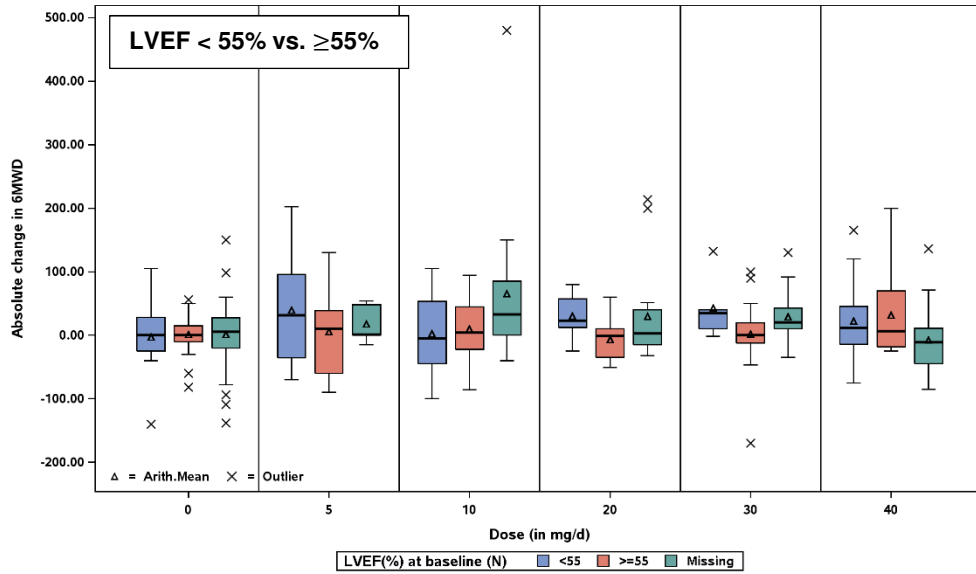

| LVEF < 55%:    |         |
|----------------|---------|
| Model shape    | P-value |
| Linear         | 0.28    |
| SigmoidalEmax1 | 0.31    |
| SigmoidalEmax2 | 0.27    |
| Emax           | 0.18    |
| Quadratic      | 0.20    |
| LVEF ≥ 55%:    |         |
| Model shape    | P-value |
| Linear         | 0.31    |
| SigmoidalEmax1 | 0.55    |
| SigmoidalEmax2 | 0.41    |
| Emax           | 0.47    |
| Quadratic      | 0.56    |
| LVEF missing:  |         |
| Model shape    | P-value |
| Linear         | 0.78    |
| SigmoidalEmax1 | 0.30    |
| SigmoidalEmax2 | 0.85    |
| Emax           | 0.10    |
| Quadratic      | 0.29    |

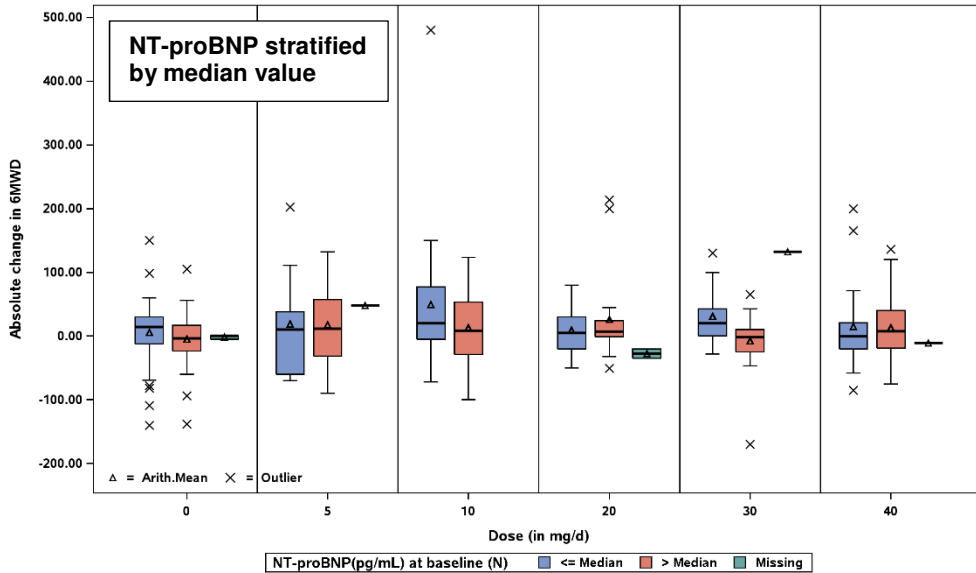

| NT-proBNP ≤ median value |         |
|--------------------------|---------|
| Model shape              | P-value |
| Linear                   | 0.53    |
| SigmoidalEmax1           | 0.38    |
| SigmoidalEmax2           | 0.63    |
| Emax                     | 0.18    |
| Quadratic                | 0.35    |
| NT-proBNP > median value |         |
| Model shape              | P-value |
| Linear                   | 0.46    |
| SigmoidalEmax1           | 0.31    |
| SigmoidalEmax2           | 0.54    |
| Emax                     | 0.15    |
| Quadratic                | 0.30    |

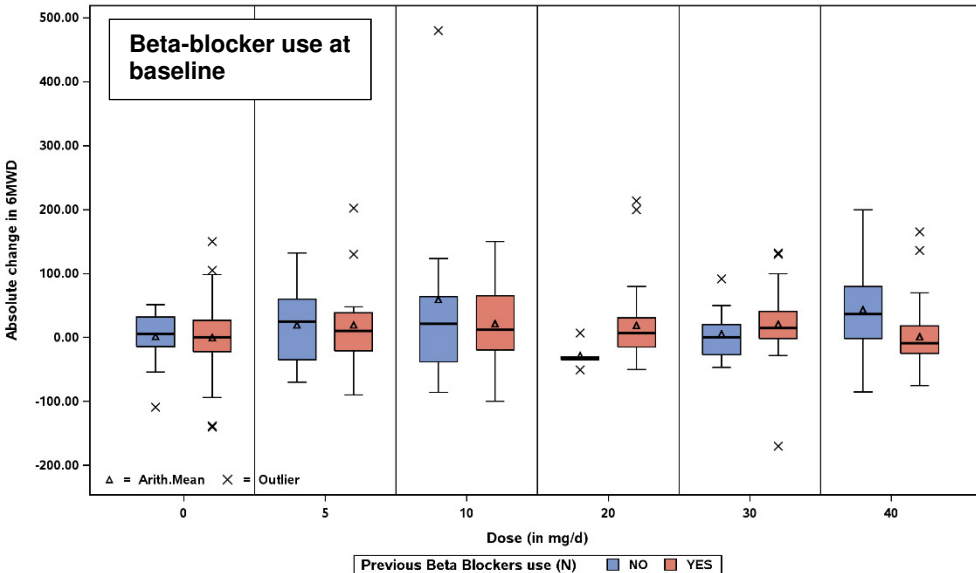

| Beta-blocker use: No  |         |
|-----------------------|---------|
| Model shape           | P-value |
| Linear                | 0.53    |
| SigmoidalEmax1        | 0.21    |
| SigmoidalEmax2        | 0.55    |
| Emax                  | 0.08    |
| Quadratic             | 0.16    |
| Beta-blocker use: Yes |         |
| Model shape           | P-value |
| Linear                | 0.41    |
| SigmoidalEmax1        | 0.46    |
| SigmoidalEmax2        | 0.56    |
| Emax                  | 0.27    |
| Quadratic             | 0.48    |

**eFigure 5. Changes in Primary and Secondary Efficacy Endpoints From Baseline to 20 Weeks, Neladenoson vs. Placebo Treatment Groups: Box Plots (Per-Protocol Set)**

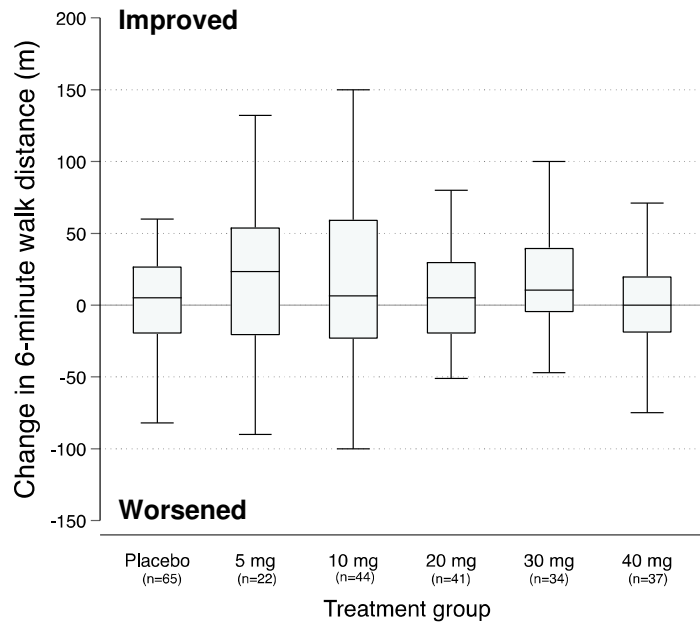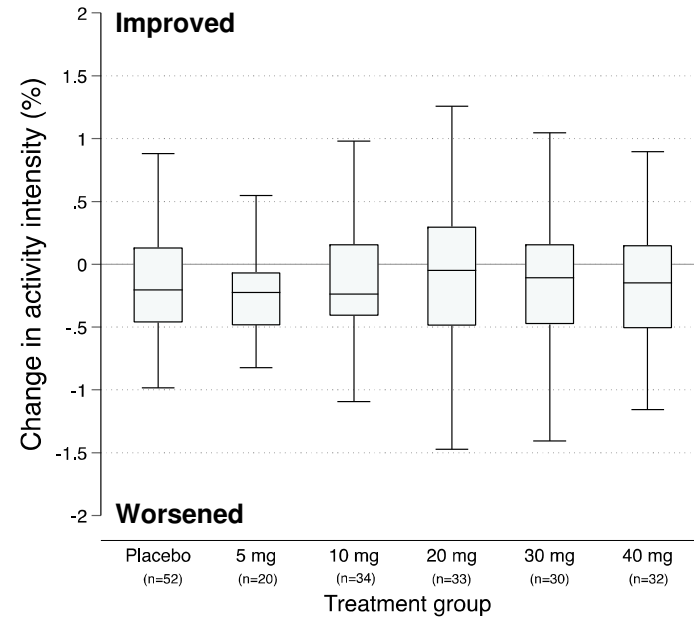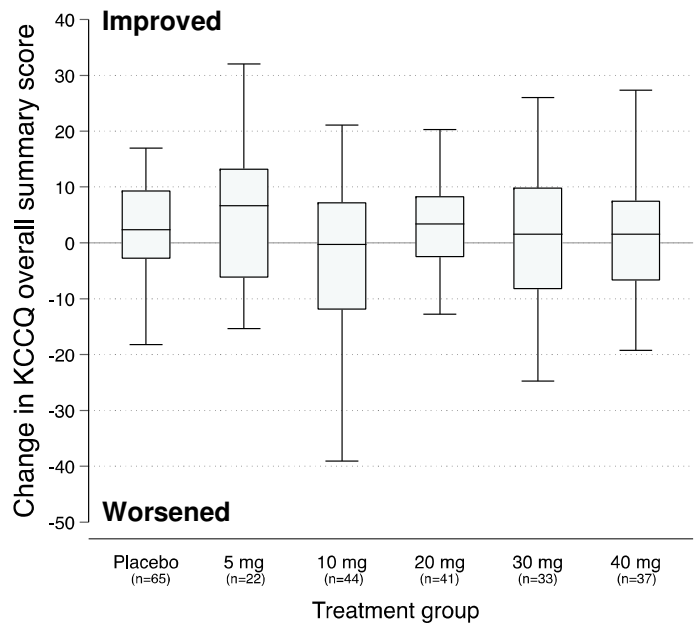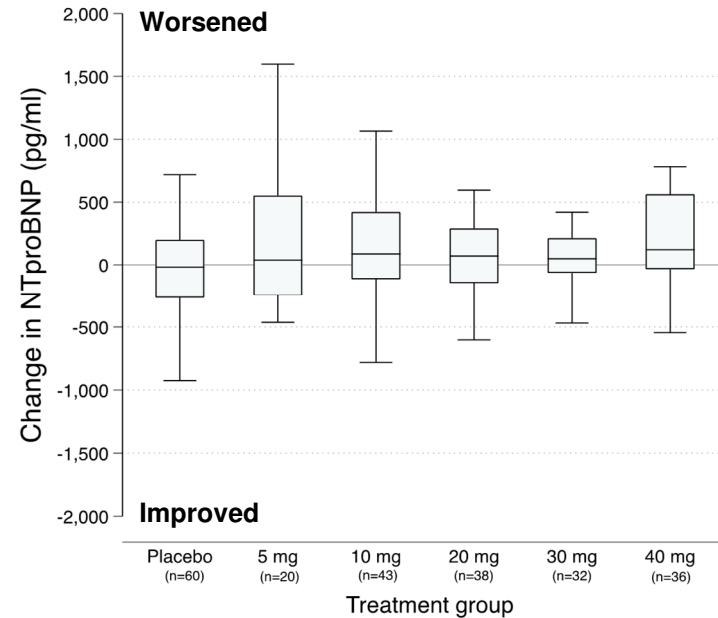



**eFigure 6. Changes in Primary and Secondary Efficacy Endpoints From Baseline to 20 Weeks, Neladenoson vs. Placebo Treatment Groups: Parallel Line Plots (Per Protocol Set)**

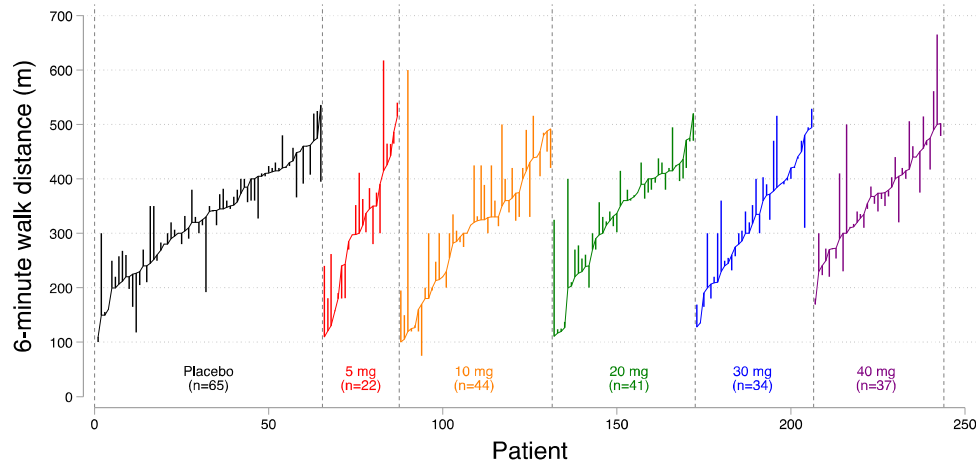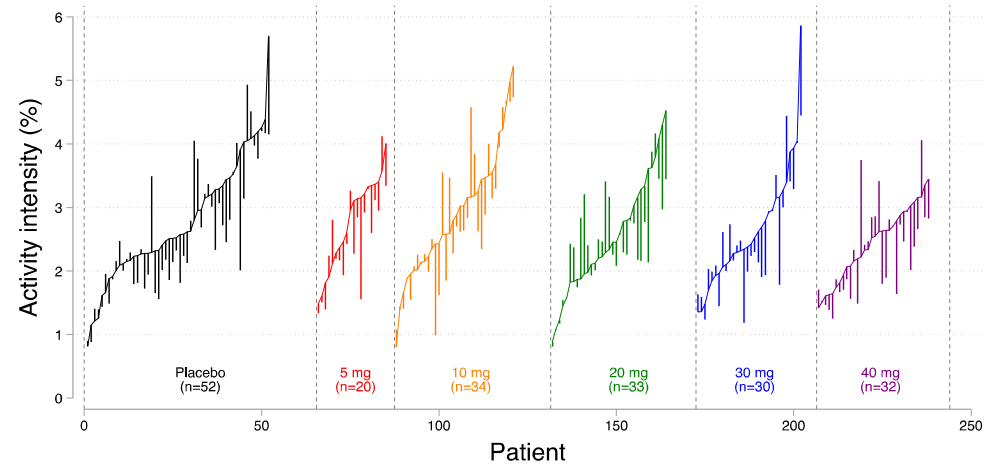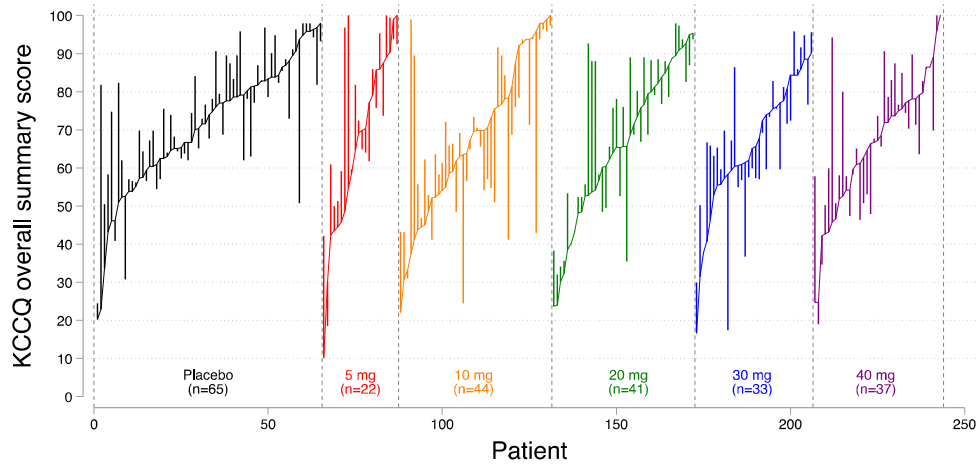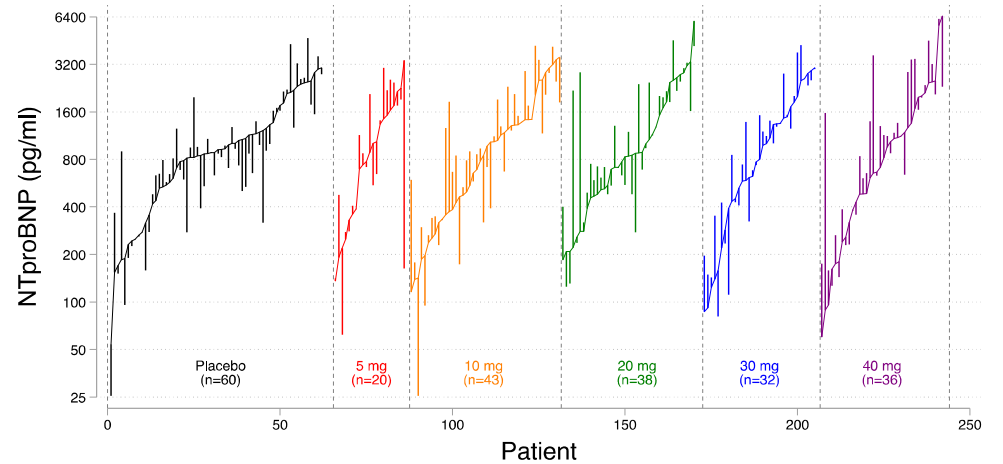

**eFigure 7. Relationship between Neladenoson Bialanate Dose Groups and Change in Estimated Glomerular Filtration Rate  
Linear model, full analysis set:**

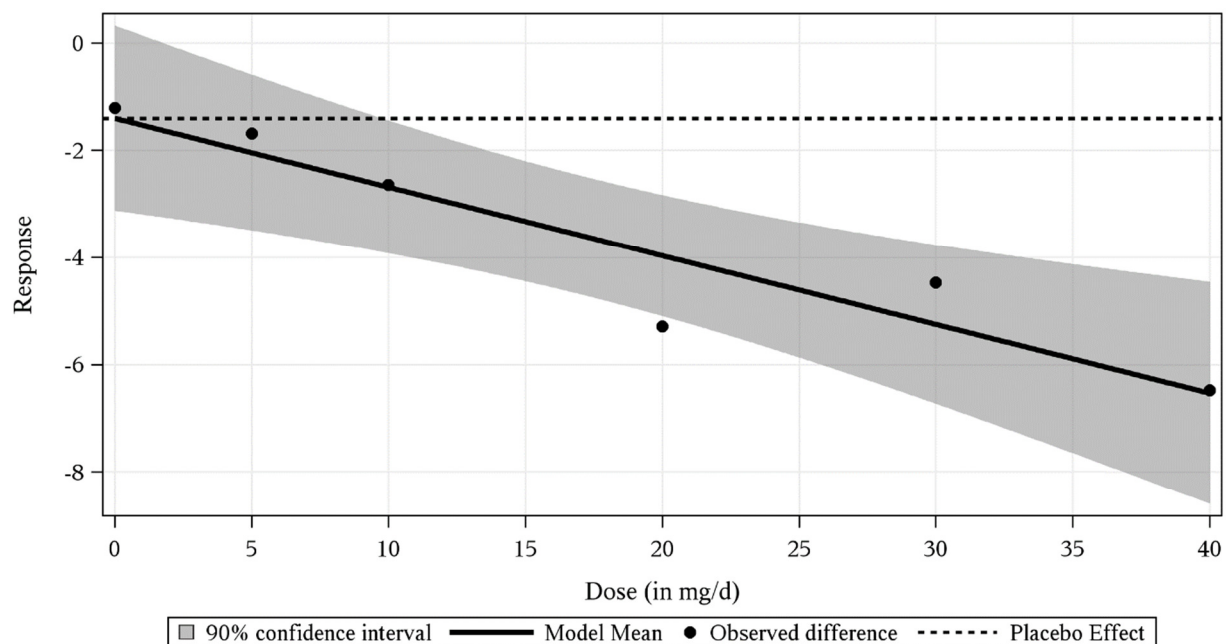

For each patient without an observation at end of treatment the missing values were imputed according to a last observation carried forward (LOCF) approach, including the baseline values.

| Candidate model shape | Estimate | Standard Error | t-Statistic | Degrees of Freedom | Adjusted p-value |
|-----------------------|----------|----------------|-------------|--------------------|------------------|
| Linear                | 4.5136   | 1.5408         | 2.9294      | 262                | 0.004            |
| SigmoidalEmax1        | 4.4120   | 1.5171         | 2.9081      | 262                | 0.005            |
| SigmoidalEmax2        | 4.5722   | 1.5742         | 2.9044      | 262                | 0.005            |
| Emax                  | 3.5819   | 1.4174         | 2.5271      | 262                | 0.01             |
| Quadratic             | 4.2544   | 1.4742         | 2.8859      | 262                | 0.005            |

The Multiple Comparison Procedure-Modeling approach (MCP-Mod) was applied to calculate the adjusted p-values of the contrast tests for each candidate dose-response model.

For each patient without an observation at end of treatment the missing values were imputed according to a last observation carried forward approach (LOCF), including the baseline values.

## Stratification by ACE-inhibitor or angiotensin receptor blocker (ARB) use at baseline:

### ACE-inhibitor/ARB use at baseline

| Candidate model shape | Estimate | Standard Error | t-Statistic | Degrees of Freedom | Adjusted p-value |
|-----------------------|----------|----------------|-------------|--------------------|------------------|
| Linear                | 5.4225   | 2.0185         | 2.6864      | 175                | 0.009            |
| SigmoidalEmax1        | 5.2341   | 1.9749         | 2.6503      | 175                | 0.01             |
| SigmoidalEmax2        | 5.5516   | 2.0540         | 2.7028      | 175                | 0.009            |
| Emax                  | 3.9871   | 1.8557         | 2.1486      | 175                | 0.03             |
| Quadratic             | 4.9602   | 1.9128         | 2.5932      | 175                | 0.01             |

### No ACE-inhibitor/ARB use at baseline

| Candidate model shape | Estimate | Standard Error | t-Statistic | Degrees of Freedom | Adjusted p-value |
|-----------------------|----------|----------------|-------------|--------------------|------------------|
| Linear                | 2.9246   | 2.2089         | 1.3240      | 80                 | 0.17             |
| SigmoidalEmax1        | 2.7011   | 2.1862         | 1.2355      | 80                 | 0.19             |
| SigmoidalEmax2        | 2.8985   | 2.2715         | 1.2760      | 80                 | 0.18             |
| Emax                  | 2.5799   | 2.0331         | 1.2690      | 80                 | 0.18             |
| Quadratic             | 2.7676   | 2.1450         | 1.2902      | 80                 | 0.18             |

The Multiple Comparison Procedure-Modeling approach (MCP-Mod) was applied to calculate the adjusted p-values of the contrast tests for each candidate dose-response model.

For each patient without an observation at end of treatment the missing values were imputed according to a last observation carried forward approach (LOCF), including the baseline values.

**eFigure 8. Effect of Neladenoson Bialanate on Potassium  
Linear model, full analysis set:**

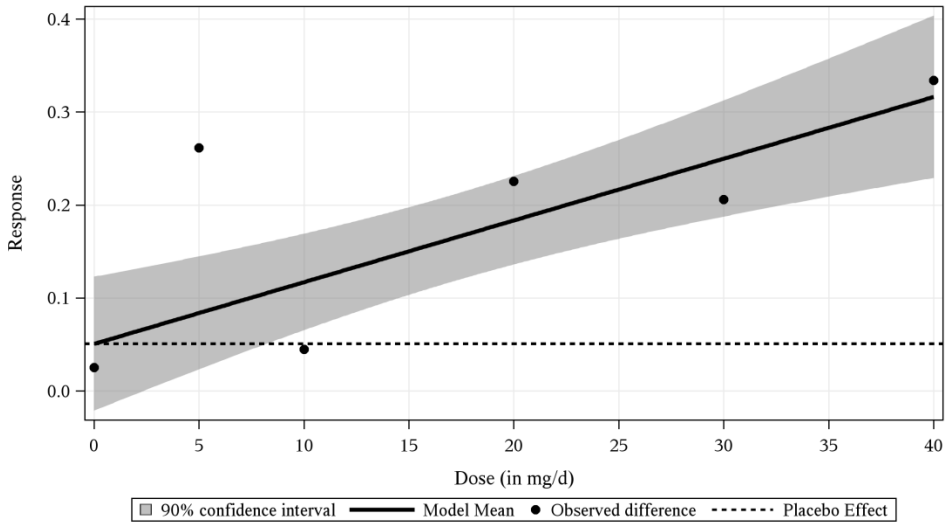

For each patient without an observation at end of treatment the missing values were imputed according to a last observation carried forward (LOCF) approach, including the baseline values.

| Candidate model shape | Estimate | Standard Error | t-Statistic | Degrees of Freedom | Adjusted p-value |
|-----------------------|----------|----------------|-------------|--------------------|------------------|
| Linear                | 0.2382   | 0.0563         | 4.2297      | 294                | <0.0001          |
| SigmoidalEmax1        | 0.1913   | 0.0553         | 3.4568      | 294                | 0.0008           |
| SigmoidalEmax2        | 0.2327   | 0.0575         | 4.0443      | 294                | 0.0001           |
| Emax                  | 0.1809   | 0.0515         | 3.5145      | 294                | 0.0007           |
| Quadratic             | 0.1949   | 0.0537         | 3.6324      | 294                | 0.0005           |

The Multiple Comparison Procedure-Modeling approach (MCP-Mod) was applied to calculate the adjusted p-values of the contrast tests for each candidate dose-response model.

For each patient without an observation at end of treatment the missing values were imputed according to a last observation carried forward approach (LOCF), including the baseline values.

**eFigure 9. Relationship between Neladenoson Bialanate Dose Groups and Heart Rate**

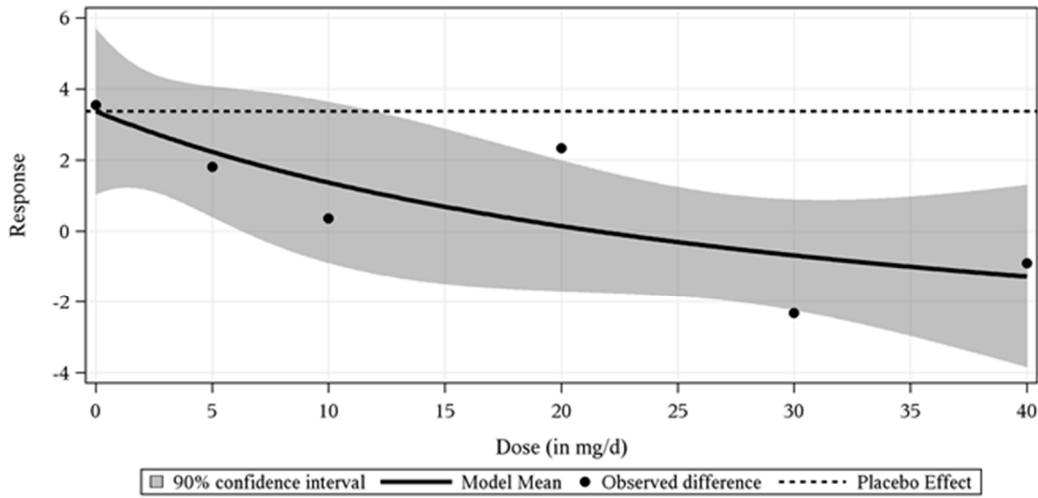

For each patient without an observation at maximum of day 142 and two days after last study drug intake the missing values were imputed according to a last observation carried forward (LOCF) approach, including the baseline values.

| Candidate model shape | Estimate | Standard Error | t-Statistic | Degrees of Freedom | Adjusted p-value |
|-----------------------|----------|----------------|-------------|--------------------|------------------|
| Linear                | 2.9686   | 1.4716         | 2.0172      | 298                | 0.04             |
| SigmoidalEmax1        | 2.7303   | 1.4476         | 1.8861      | 298                | 0.06             |
| SigmoidalEmax2        | 2.8986   | 1.5047         | 1.9263      | 298                | 0.05             |
| Emax                  | 2.9143   | 1.3421         | 2.1715      | 298                | 0.03             |
| Quadratic             | 2.9597   | 1.4028         | 2.1098      | 298                | 0.04             |

The Multiple Comparison Procedure-Modeling approach (MCP-Mod) was applied to calculate the adjusted p-values of the contrast tests for each candidate dose-response model.

For each patient without an observation at maximum of day 142 and two days after last study drug intake the missing values were imputed according to a last observation carried forward approach (LOCF), including the baseline values.

**eFigure 10. Plasma Concentration of Neladenoson Bialanate by Extent of Exposure**

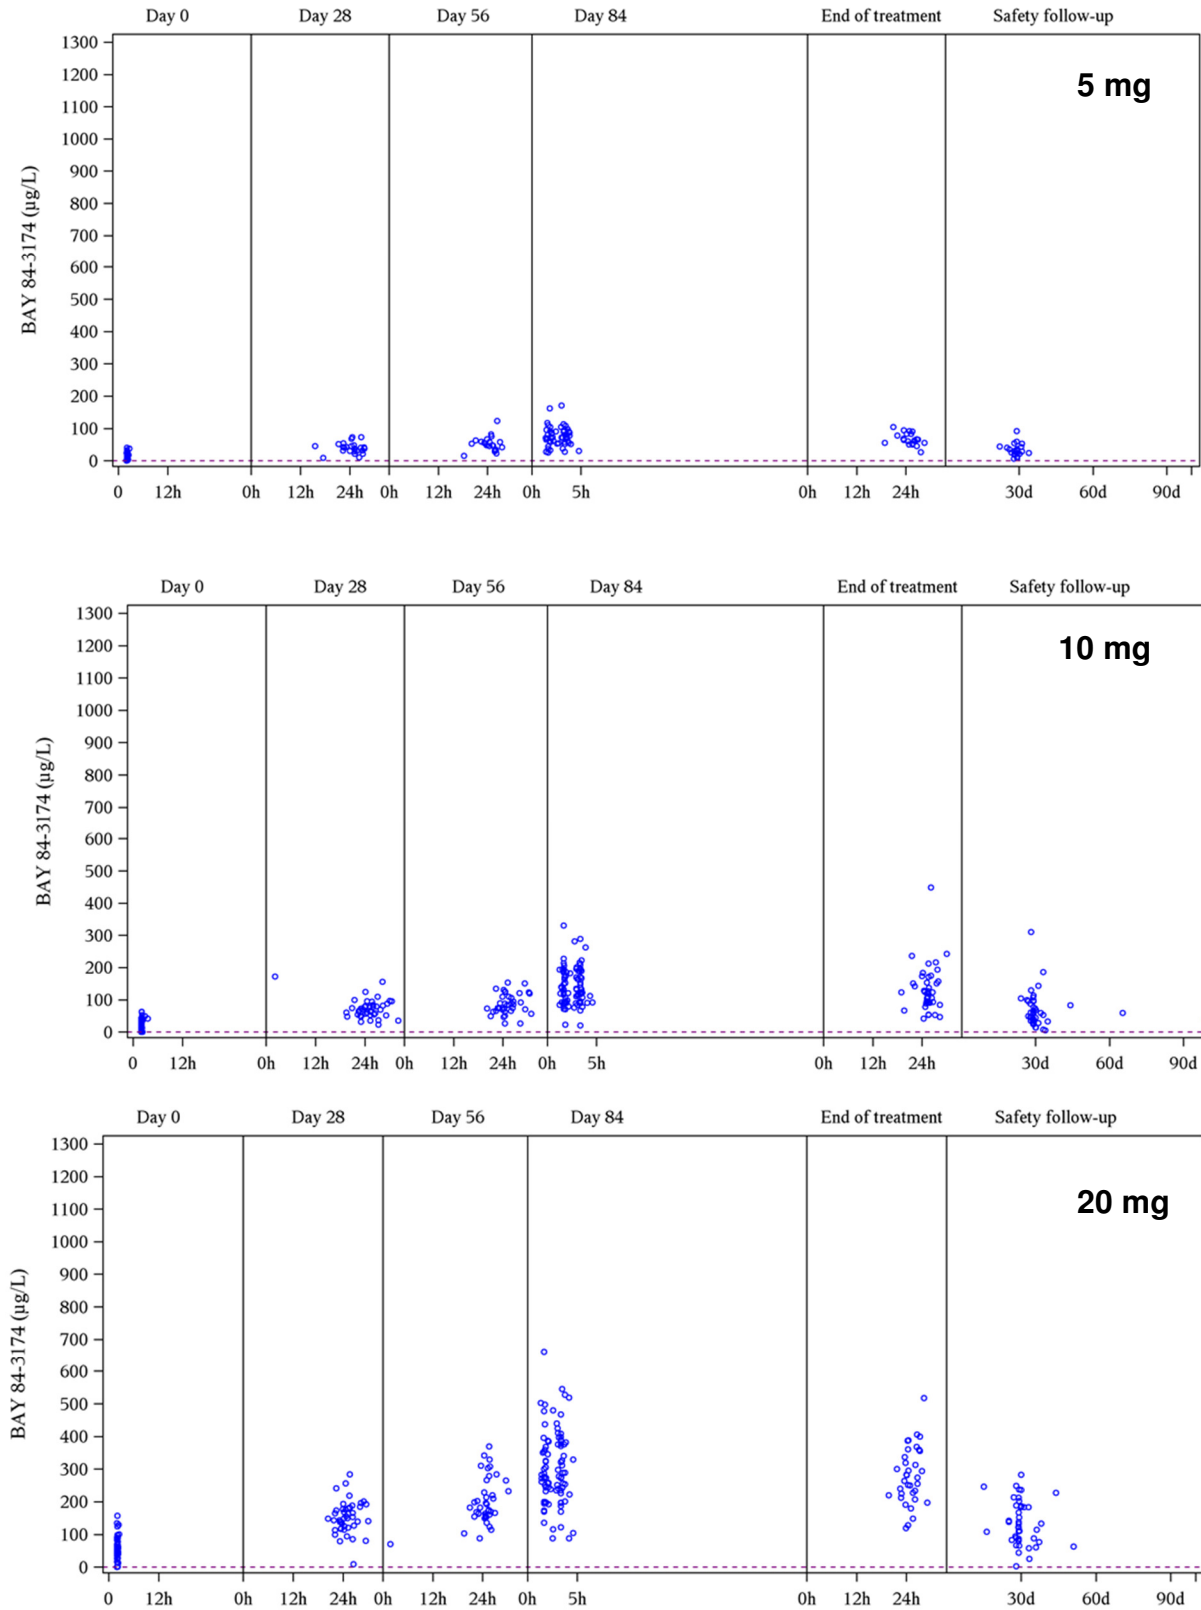

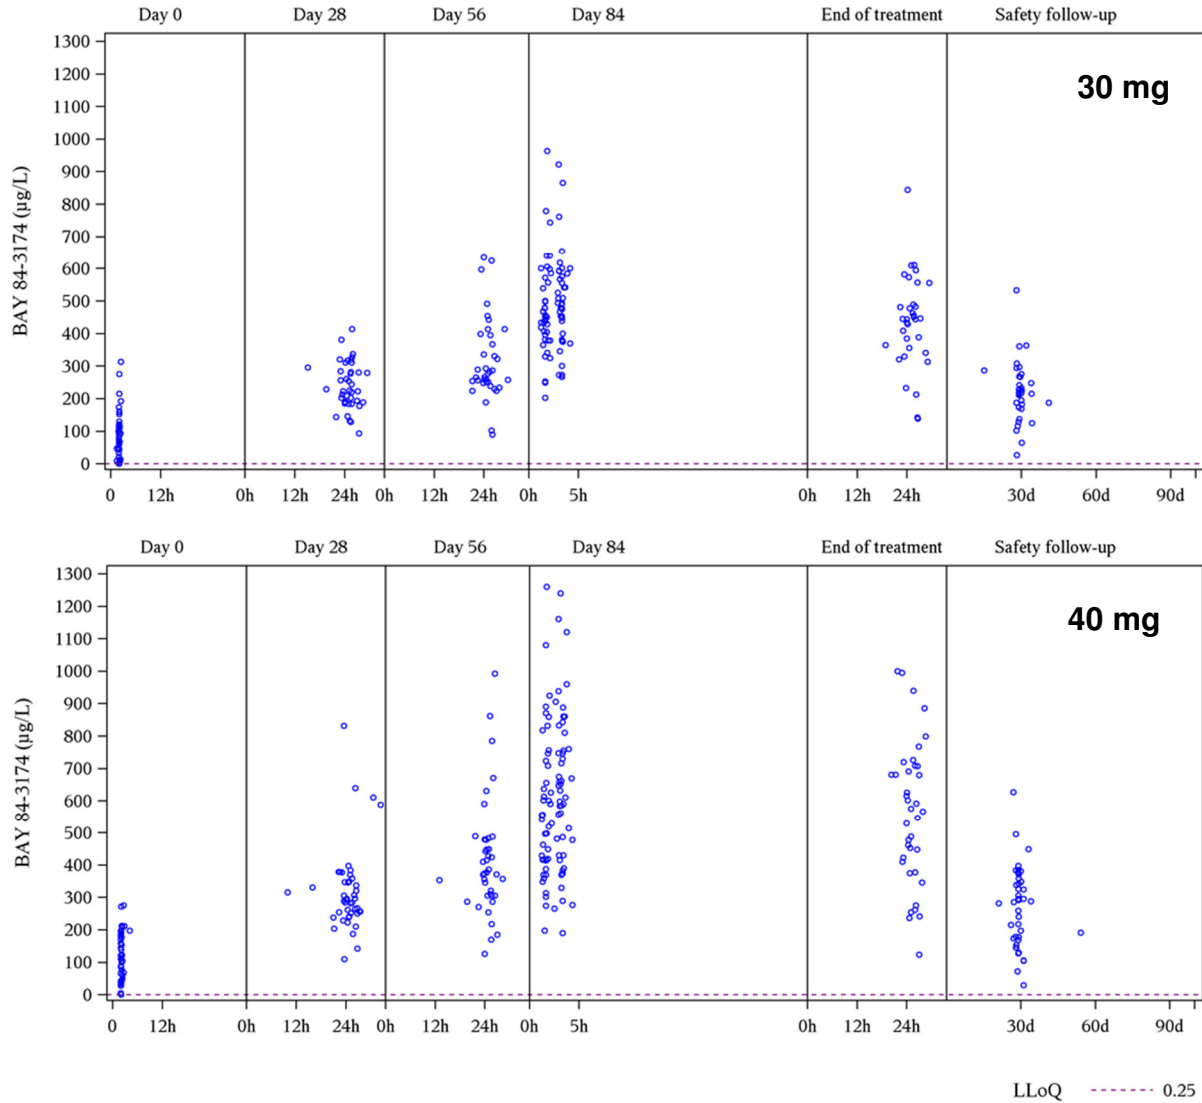

LLOQ = lower limit of quantitation; BAY 84-3174 = neladenoson bialanate. Plasma concentration of the study drug was measured in all study participants during the following study visits and times: baseline, 2 hours post-dose; Week 4 [Day 28], pre-dose; Week 8 [Day 56], pre-dose; Week 12 [Day 84], 2 and 4 hours post-dose; Week 20 [end-of-treatment]; and Week 24 [safety follow-up], 28-days after end-of-treatment.
