# Supplementary material
Source: PubMed Central journal article supplement (PMC6549300)
Supplement: jama-321-2101-s003.pdf [file jama-321-2101-s003.pdf]

## Data Sharing Statement

Shah. Effect of Neladenoson Bialanate on Exercise Capacity Among Patients With Heart Failure With Preserved Ejection Fraction. *JAMA*. Published June 04, 2019. 10.1001/jama.2019.6717

### Data

**Data available:** No

### Additional Information

**Explanation for why data not available:** The de-identified data have been shared with University of Groningen and Northwestern University for independent verification of all analyses.
